# Supplementary figures and images for: Identification of Key Biomarkers in Pulmonary Arterial Hypertension Based on Weighted Gene Co-expression Network Analysis
Source: Preprints.org preprint supplement (doi:10.20944/preprints202408.0909.v1), 2024-08-13

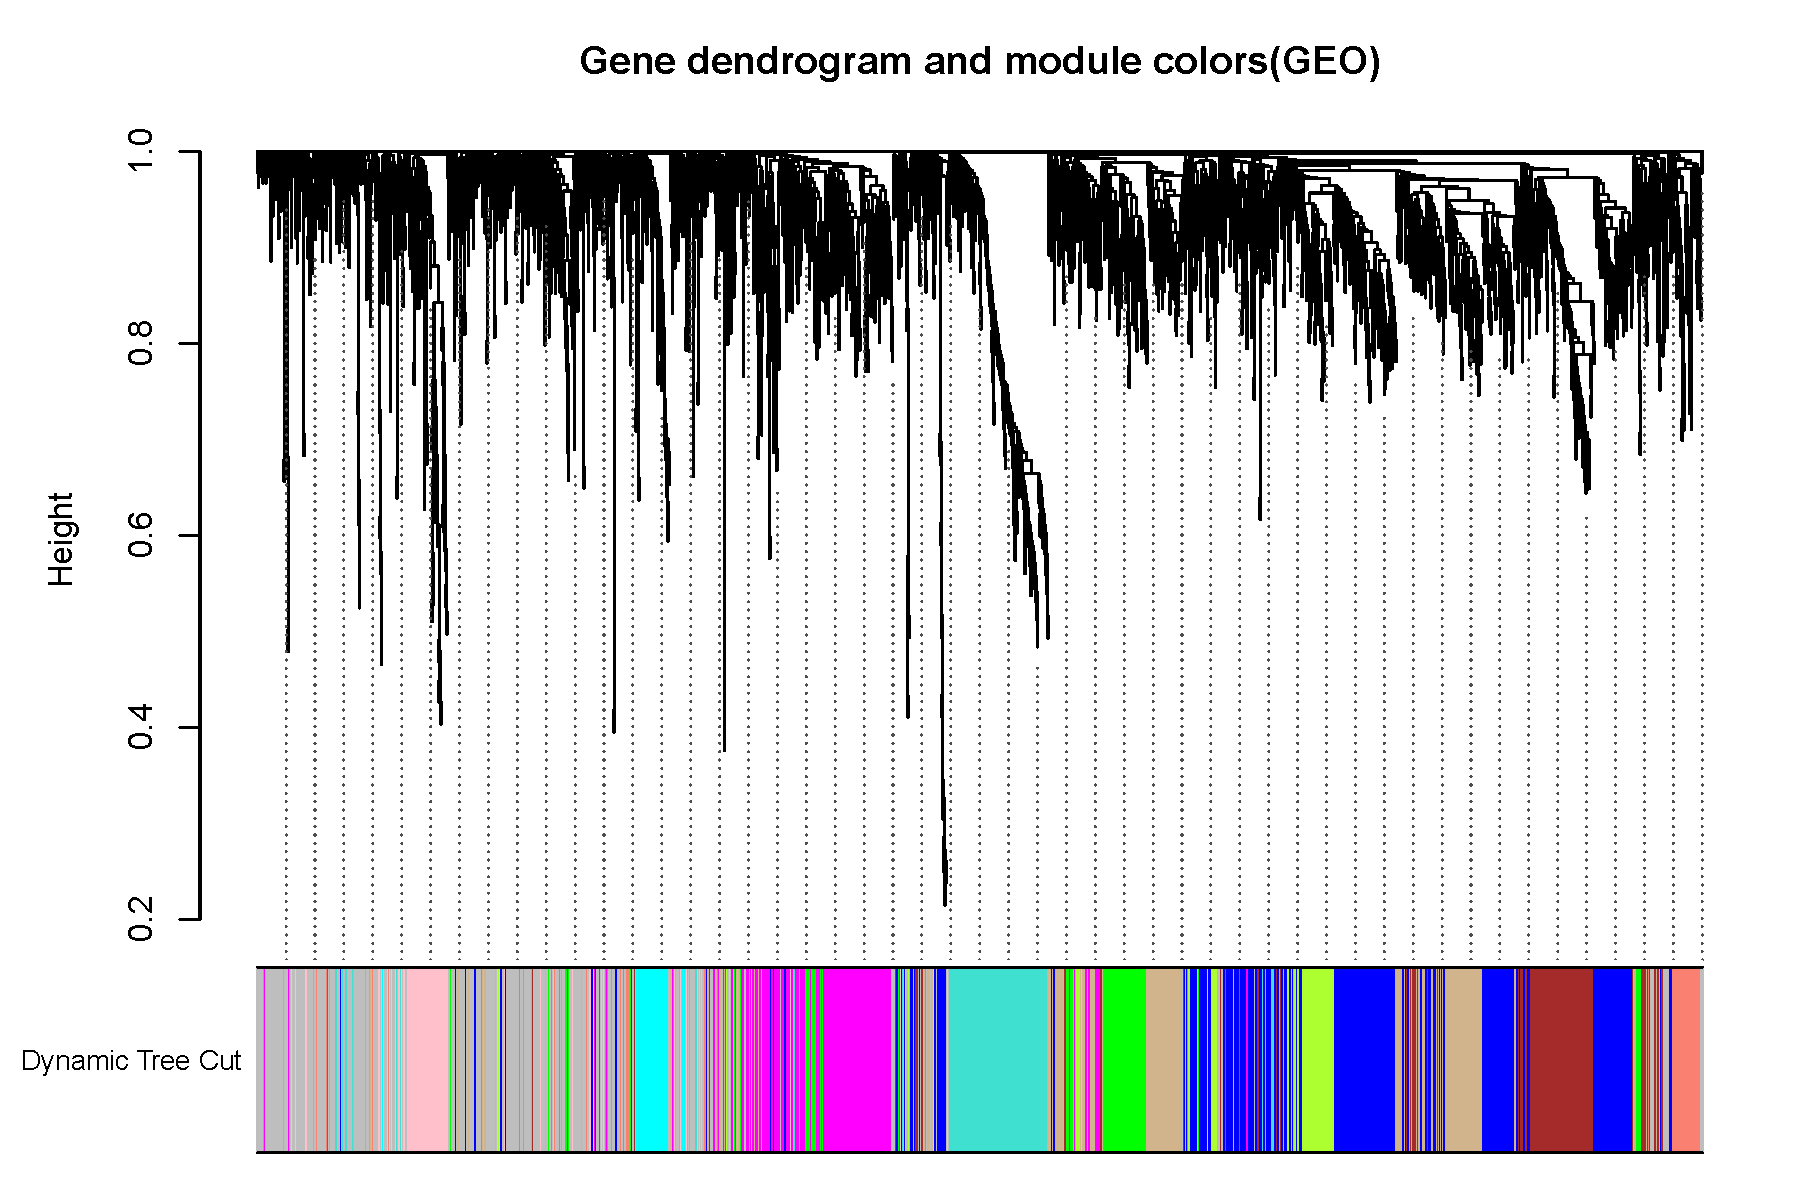


**FIGURE 1.**

**
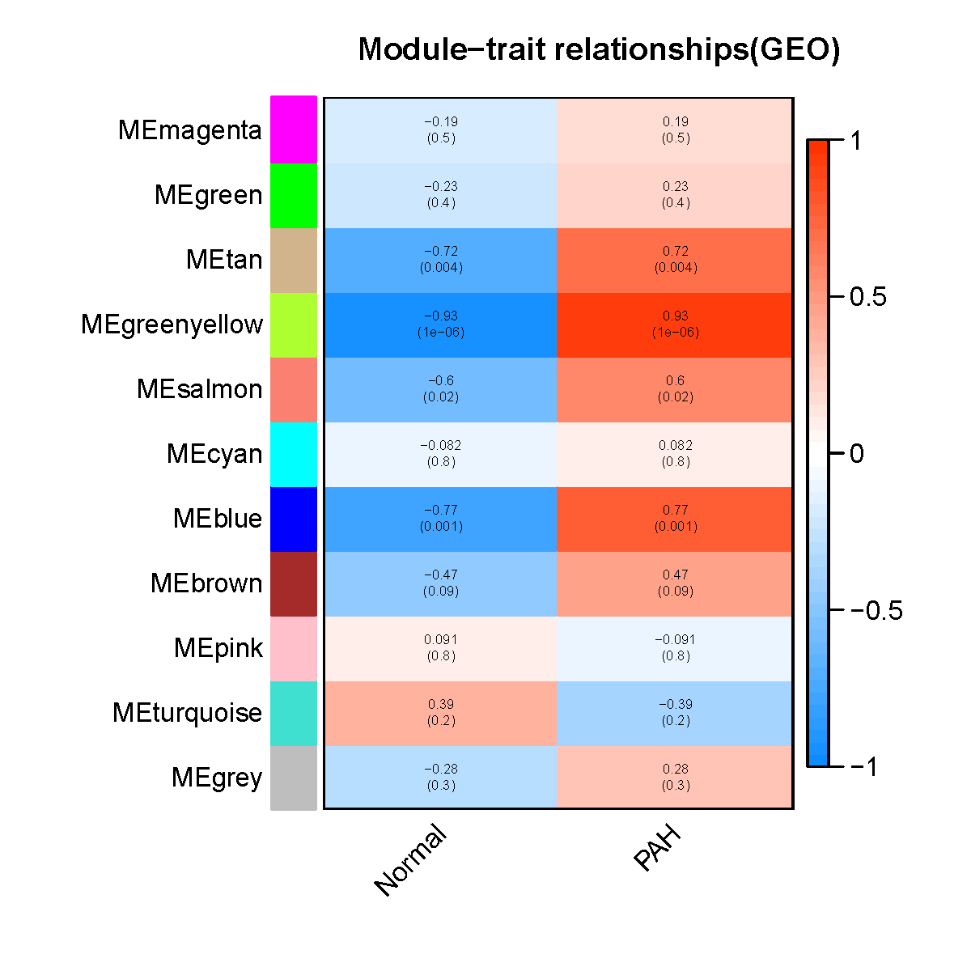
**

**FIGURE 2.**

**
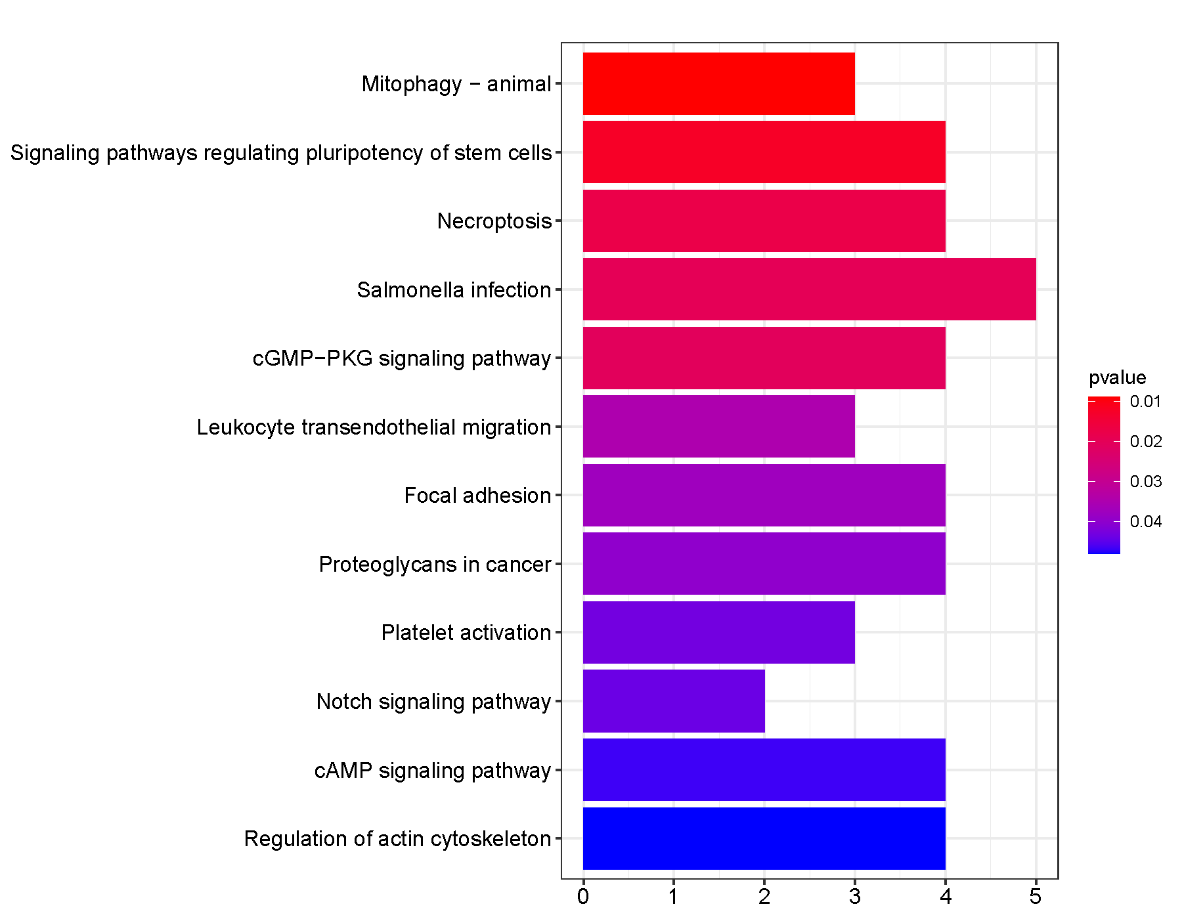
**

**FIGURE 3.**

**
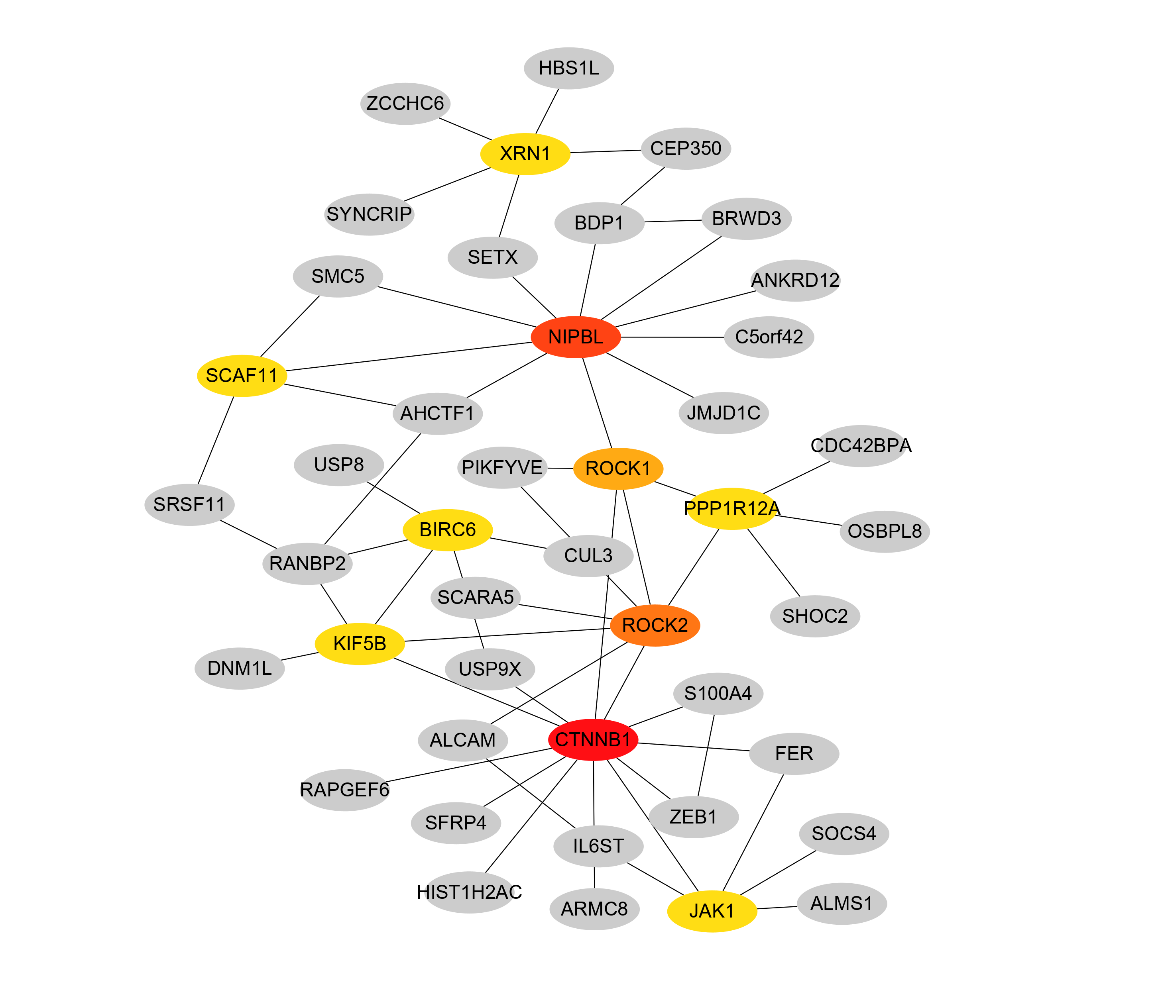
**

**FIGURE 4.**

Supplement: Supplementary file 2 [file supplementary]
